# Supplementary material for: Sonorensin: A new bacteriocin with potential of an anti-biofilm agent and a food biopreservative
Source: PubMed Central journal article supplement (PMC4544038; doi:10.1038/srep13412), 2015-08-21
Supplement: srep13412-s1.pdf [file srep13412-s1.pdf]

## **Supplementary Information**

### **Sonorensin: A new bacteriocin with potential of an anti-biofilm agent and a food biopreservative**

Lipsy Chopra, Gurdeep Singh, Kautilya Kumar Jena and Debendra K. Sahoo\*

Biochemical Engineering Research and Process Development Centre

CSIR-Institute of Microbial Technology, Sector-39A

Chandigarh-160036, INDIA

\* Corresponding author: [debsahoo@imtech.res.in](mailto:debsahoo@imtech.res.in)

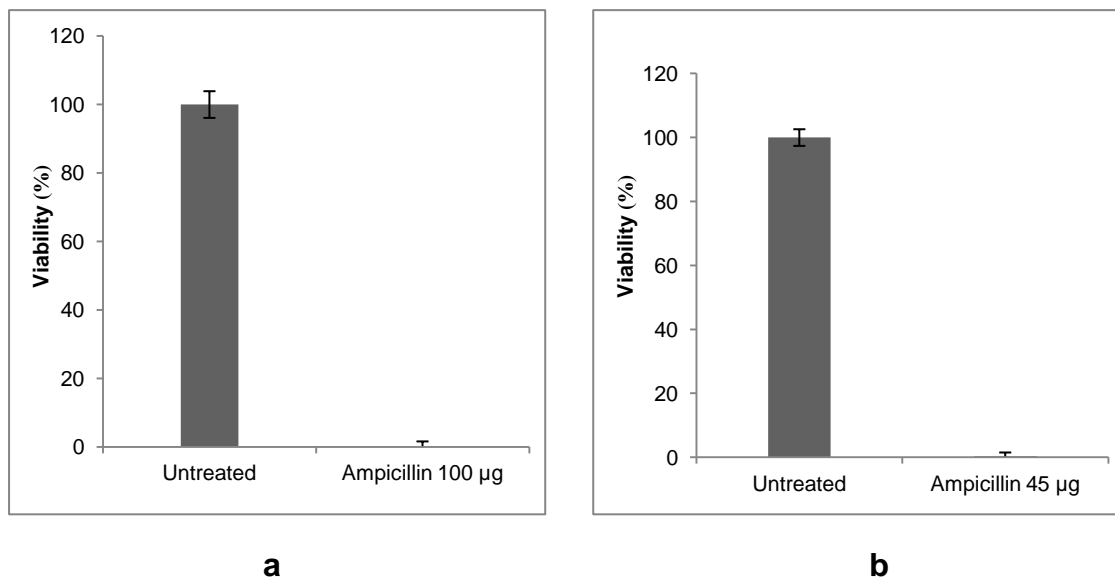

**Supplementary Figure S1:** Cell viability of vegetative cells in the presence of ampicillin (a) *E. coli* and (b) *S. aureus*. The experiments were carried out three times in triplicate. The results were presented as mean  $\pm$  SD and differences between the control and treated samples were statistically significant (n=3) ( $p < 0.005$ )

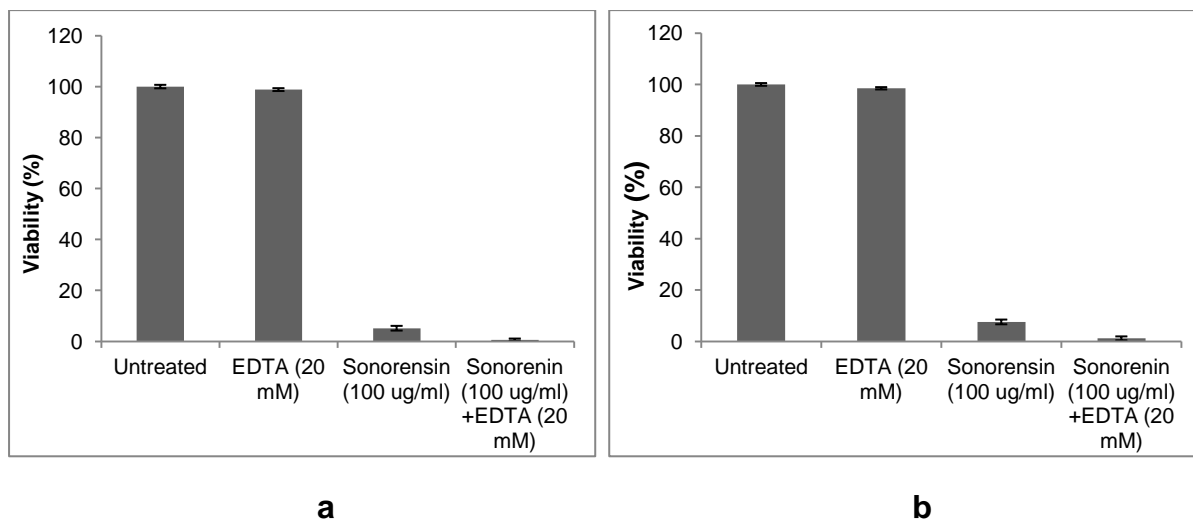

**Supplementary Figure S2:** Effect of 20 mM EDTA on sonorensin activity against (a) vegetative cells (b) non- multiplying cells of *E.coli*. The inhibitory activity of sonorensin increased in the presence of EDTA. The experiments were carried out three times in triplicate. The results were presented as mean  $\pm$  SD and differences between the control and treated samples were statistically significant (n=3) ( $p < 0.005$ )

## **Supplementary Methods**

### **Effect of EDTA on sonorensin activity**

*E. coli* cells ( $\sim 2.1 \times 10^5$ ) were resuspended in one tube of each of the following: (i) PBS buffer (pH 7.0) alone, (ii) 20 mM EDTA in PBS buffer (pH 7.0), (iii) Sonorensin (100  $\mu\text{g/ml}$ ) in PBS buffer (pH 7.0), and (iv) Sonorensin (100  $\mu\text{g/ml}$ ) and 20 mM EDTA in PBS buffer (pH 7.0). Cell suspensions were incubated for 2 h at 37 °C and 200 RPM. The treated cells were harvested by centrifugation (5 min), washed twice with PBS buffer, and spread on plates of BHI agar. Plates were incubated at 37 °C for 24 h, and CFU/ml was estimated.

### **Haemolytic activity assay**

Fresh human blood was collected in BD vacutainer and layered on histopaque- 1077. It was then centrifuged for 30 min at  $400 \times g$ , the RBCs obtained as pellet were washed three times with 0.9 % (w/v) and finally resuspended in 0.9 % NaCl. Then, 95  $\mu\text{l}$  aliquots of the RBCs suspension were incubated with 5  $\mu\text{l}$  of purified sonorensin at various concentrations for 2 h (50  $\mu\text{g/ml}$  – 500  $\mu\text{g/ml}$ ) at 37 °C with gentle mixing. The samples were then centrifuged and the absorbance of the supernatant was measured at 415 nm. Complete lysis was measured by suspending RBC's in 1 % Triton X-100. Percent haemolysis was calculated as:

$$\text{Percentage haemolysis} = 100[(A - A_0)/(A_t - A_0)]$$

Where A represents absorbance of peptide sample at 415 nm and  $A_0$  and  $A_t$  represent zero percent and 100 % haemolysis determined in PBS and 1 % Triton X-100, respectively.

### **Cytoplasmic membrane permeability**

Bacterial cells, collected in mid-log phase and suspended in M9 minimal medium, were incubated at 37 °C for 8 h with lactose as the sole carbon source. At concentration of 0.3  $A_{600}$  nm ( $\approx 1.0 \times 10^6$  CFU/ml), 200  $\mu\text{l}$  of bacterial suspension was added into 96-well plate followed by addition of 10  $\mu\text{l}$  ONPG (30 mM) added to each well. Then, 10  $\mu\text{l}$  of sonorensin and nisin were added (50  $\mu\text{g/ml}$ ) to each well and the plates were incubated with gentle shaking at 37

°C. The hydrolysis of ONPG to O-nitrophenol over time was monitored at 405 nm with a microplate reader (Biotek, USA).
